# Supplementary material
Source: publisher figshare collection journal article supplement (https://acs.figshare.com/ndownloader/files/10359471)
Supplement: Supplementary file 1 [file 10359471]

data_import01
_audit_creation_date              2018-01-10
_audit_creation_method
;
Olex2 1.2
(compiled 2017.08.10 svn.r3458 for OlexSys, GUI svn.r5381)
;
_shelx_SHELXL_version_number      '2014/7'
_publ_contact_author_address      ?
_publ_contact_author_email        ?
_publ_contact_author_id_orcid     ?
_publ_contact_author_name         ''
_publ_contact_author_phone        ?
_publ_section_references
;
Dolomanov, O.V., Bourhis, L.J., Gildea, R.J, Howard, J.A.K. & Puschmann, H.
 (2009), J. Appl. Cryst. 42, 339-341.

Sheldrick, G.M. (2008). Acta Cryst. A64, 112-122.
;
_chemical_name_common             ?
_chemical_name_systematic         ?
_chemical_formula_moiety          '0.25(C204 O123.2 Zr24), 2.67(O3)'
_chemical_formula_sum             'C51.01 O38.81 Zr6'
_chemical_formula_weight          1780.92
_chemical_melting_point           ?
loop_
  _atom_type_symbol
  _atom_type_description
  _atom_type_scat_dispersion_real
  _atom_type_scat_dispersion_imag
  _atom_type_scat_source
 'C' 'C' 0.0020 0.0010 'International Tables Vol C Tables 4.2.6.8 and 6.1.1.4'
 'O' 'O' 0.0080 0.0040 'International Tables Vol C Tables 4.2.6.8 and 6.1.1.4'
 'Zr' 'Zr' -1.2520 3.1860
 'International Tables Vol C Tables 4.2.6.8 and 6.1.1.4'

_shelx_space_group_comment
;
The symmetry employed for this shelxl refinement is uniquely defined
by the following loop, which should always be used as a source of
symmetry information in preference to the above space-group names.
They are only intended as comments.
;
_space_group_crystal_system       'cubic'
_space_group_IT_number            225
_space_group_name_H-M_alt         'F m -3 m'
_space_group_name_Hall            '-F 4 2 3'
loop_
  _space_group_symop_operation_xyz
 'x, y, z'
 'x, -y, -z'
 '-x, -y, z'
 '-x, y, -z'
 '-y, x, z'
 'y, x, -z'
 'y, -x, z'
 '-y, -x, -z'
 'y, z, x'
 '-y, -z, x'
 'y, -z, -x'
 '-y, z, -x'
 '-z, y, x'
 '-z, -y, -x'
 'z, -y, x'
 'z, y, -x'
 'z, x, y'
 '-z, x, -y'
 '-z, -x, y'
 'z, -x, -y'
 '-x, -z, -y'
 '-x, z, y'
 'x, -z, y'
 'x, z, -y'
 'x, y+1/2, z+1/2'
 'x, -y+1/2, -z+1/2'
 '-x, -y+1/2, z+1/2'
 '-x, y+1/2, -z+1/2'
 '-y, x+1/2, z+1/2'
 'y, x+1/2, -z+1/2'
 'y, -x+1/2, z+1/2'
 '-y, -x+1/2, -z+1/2'
 'y, z+1/2, x+1/2'
 '-y, -z+1/2, x+1/2'
 'y, -z+1/2, -x+1/2'
 '-y, z+1/2, -x+1/2'
 '-z, y+1/2, x+1/2'
 '-z, -y+1/2, -x+1/2'
 'z, -y+1/2, x+1/2'
 'z, y+1/2, -x+1/2'
 'z, x+1/2, y+1/2'
 '-z, x+1/2, -y+1/2'
 '-z, -x+1/2, y+1/2'
 'z, -x+1/2, -y+1/2'
 '-x, -z+1/2, -y+1/2'
 '-x, z+1/2, y+1/2'
 'x, -z+1/2, y+1/2'
 'x, z+1/2, -y+1/2'
 'x+1/2, y, z+1/2'
 'x+1/2, -y, -z+1/2'
 '-x+1/2, -y, z+1/2'
 '-x+1/2, y, -z+1/2'
 '-y+1/2, x, z+1/2'
 'y+1/2, x, -z+1/2'
 'y+1/2, -x, z+1/2'
 '-y+1/2, -x, -z+1/2'
 'y+1/2, z, x+1/2'
 '-y+1/2, -z, x+1/2'
 'y+1/2, -z, -x+1/2'
 '-y+1/2, z, -x+1/2'
 '-z+1/2, y, x+1/2'
 '-z+1/2, -y, -x+1/2'
 'z+1/2, -y, x+1/2'
 'z+1/2, y, -x+1/2'
 'z+1/2, x, y+1/2'
 '-z+1/2, x, -y+1/2'
 '-z+1/2, -x, y+1/2'
 'z+1/2, -x, -y+1/2'
 '-x+1/2, -z, -y+1/2'
 '-x+1/2, z, y+1/2'
 'x+1/2, -z, y+1/2'
 'x+1/2, z, -y+1/2'
 'x+1/2, y+1/2, z'
 'x+1/2, -y+1/2, -z'
 '-x+1/2, -y+1/2, z'
 '-x+1/2, y+1/2, -z'
 '-y+1/2, x+1/2, z'
 'y+1/2, x+1/2, -z'
 'y+1/2, -x+1/2, z'
 '-y+1/2, -x+1/2, -z'
 'y+1/2, z+1/2, x'
 '-y+1/2, -z+1/2, x'
 'y+1/2, -z+1/2, -x'
 '-y+1/2, z+1/2, -x'
 '-z+1/2, y+1/2, x'
 '-z+1/2, -y+1/2, -x'
 'z+1/2, -y+1/2, x'
 'z+1/2, y+1/2, -x'
 'z+1/2, x+1/2, y'
 '-z+1/2, x+1/2, -y'
 '-z+1/2, -x+1/2, y'
 'z+1/2, -x+1/2, -y'
 '-x+1/2, -z+1/2, -y'
 '-x+1/2, z+1/2, y'
 'x+1/2, -z+1/2, y'
 'x+1/2, z+1/2, -y'
 '-x, -y, -z'
 '-x, y, z'
 'x, y, -z'
 'x, -y, z'
 'y, -x, -z'
 '-y, -x, z'
 '-y, x, -z'
 'y, x, z'
 '-y, -z, -x'
 'y, z, -x'
 '-y, z, x'
 'y, -z, x'
 'z, -y, -x'
 'z, y, x'
 '-z, y, -x'
 '-z, -y, x'
 '-z, -x, -y'
 'z, -x, y'
 'z, x, -y'
 '-z, x, y'
 'x, z, y'
 'x, -z, -y'
 '-x, z, -y'
 '-x, -z, y'
 '-x, -y+1/2, -z+1/2'
 '-x, y+1/2, z+1/2'
 'x, y+1/2, -z+1/2'
 'x, -y+1/2, z+1/2'
 'y, -x+1/2, -z+1/2'
 '-y, -x+1/2, z+1/2'
 '-y, x+1/2, -z+1/2'
 'y, x+1/2, z+1/2'
 '-y, -z+1/2, -x+1/2'
 'y, z+1/2, -x+1/2'
 '-y, z+1/2, x+1/2'
 'y, -z+1/2, x+1/2'
 'z, -y+1/2, -x+1/2'
 'z, y+1/2, x+1/2'
 '-z, y+1/2, -x+1/2'
 '-z, -y+1/2, x+1/2'
 '-z, -x+1/2, -y+1/2'
 'z, -x+1/2, y+1/2'
 'z, x+1/2, -y+1/2'
 '-z, x+1/2, y+1/2'
 'x, z+1/2, y+1/2'
 'x, -z+1/2, -y+1/2'
 '-x, z+1/2, -y+1/2'
 '-x, -z+1/2, y+1/2'
 '-x+1/2, -y, -z+1/2'
 '-x+1/2, y, z+1/2'
 'x+1/2, y, -z+1/2'
 'x+1/2, -y, z+1/2'
 'y+1/2, -x, -z+1/2'
 '-y+1/2, -x, z+1/2'
 '-y+1/2, x, -z+1/2'
 'y+1/2, x, z+1/2'
 '-y+1/2, -z, -x+1/2'
 'y+1/2, z, -x+1/2'
 '-y+1/2, z, x+1/2'
 'y+1/2, -z, x+1/2'
 'z+1/2, -y, -x+1/2'
 'z+1/2, y, x+1/2'
 '-z+1/2, y, -x+1/2'
 '-z+1/2, -y, x+1/2'
 '-z+1/2, -x, -y+1/2'
 'z+1/2, -x, y+1/2'
 'z+1/2, x, -y+1/2'
 '-z+1/2, x, y+1/2'
 'x+1/2, z, y+1/2'
 'x+1/2, -z, -y+1/2'
 '-x+1/2, z, -y+1/2'
 '-x+1/2, -z, y+1/2'
 '-x+1/2, -y+1/2, -z'
 '-x+1/2, y+1/2, z'
 'x+1/2, y+1/2, -z'
 'x+1/2, -y+1/2, z'
 'y+1/2, -x+1/2, -z'
 '-y+1/2, -x+1/2, z'
 '-y+1/2, x+1/2, -z'
 'y+1/2, x+1/2, z'
 '-y+1/2, -z+1/2, -x'
 'y+1/2, z+1/2, -x'
 '-y+1/2, z+1/2, x'
 'y+1/2, -z+1/2, x'
 'z+1/2, -y+1/2, -x'
 'z+1/2, y+1/2, x'
 '-z+1/2, y+1/2, -x'
 '-z+1/2, -y+1/2, x'
 '-z+1/2, -x+1/2, -y'
 'z+1/2, -x+1/2, y'
 'z+1/2, x+1/2, -y'
 '-z+1/2, x+1/2, y'
 'x+1/2, z+1/2, y'
 'x+1/2, -z+1/2, -y'
 '-x+1/2, z+1/2, -y'
 '-x+1/2, -z+1/2, y'

_cell_length_a                    20.740(10)
_cell_length_b                    20.740(10)
_cell_length_c                    20.740(10)
_cell_angle_alpha                 90
_cell_angle_beta                  90
_cell_angle_gamma                 90
_cell_volume                      8921(13)
_cell_formula_units_Z             3.99936
_cell_measurement_reflns_used     6784
_cell_measurement_temperature     100(2)
_cell_measurement_theta_max       40
_cell_measurement_theta_min       1
_shelx_estimated_absorpt_T_max    ?
_shelx_estimated_absorpt_T_min    ?
_exptl_absorpt_coefficient_mu     3.009
_exptl_absorpt_correction_T_max   ?
_exptl_absorpt_correction_T_min   ?
_exptl_absorpt_correction_type    'none'
_exptl_absorpt_process_details    ?
_exptl_absorpt_special_details    ?
_exptl_crystal_colour             'white'
_exptl_crystal_density_diffrn     1.326
_exptl_crystal_density_meas       ?
_exptl_crystal_density_method     ?
_exptl_crystal_description        'octahedra'
_exptl_crystal_F_000              3426
_exptl_crystal_size_max           0.04
_exptl_crystal_size_mid           0.04
_exptl_crystal_size_min           0.04
_exptl_transmission_factor_max    ?
_exptl_transmission_factor_min    ?
_diffrn_reflns_av_R_equivalents   0.1207
_diffrn_reflns_av_unetI/netI      0.0286
_diffrn_reflns_Laue_measured_fraction_full 1.000
_diffrn_reflns_Laue_measured_fraction_max 0.981
_diffrn_reflns_limit_h_max        25
_diffrn_reflns_limit_h_min        -25
_diffrn_reflns_limit_k_max        25
_diffrn_reflns_limit_k_min        -25
_diffrn_reflns_limit_l_max        27
_diffrn_reflns_limit_l_min        -27
_diffrn_reflns_number             29756
_diffrn_reflns_point_group_measured_fraction_full 1.000
_diffrn_reflns_point_group_measured_fraction_max 0.981
_diffrn_reflns_theta_full         21.835
_diffrn_reflns_theta_max          24.652
_diffrn_reflns_theta_min          1.483
_diffrn_ambient_temperature       100(2)
_diffrn_detector_area_resol_mean  ?
_diffrn_measured_fraction_theta_full 1.000
_diffrn_measured_fraction_theta_max 0.981
_diffrn_radiation_wavelength      0.61999
_diffrn_radiation_type            'synchrotron radiation'
_diffrn_source                    'synchrotron radiation'                       
_diffrn_measurement_device_type   'PILATUS DECTRIS 6M'                 
_diffrn_standards_number          0
_reflns_Friedel_coverage          0.000
_reflns_Friedel_fraction_full     .
_reflns_Friedel_fraction_max      .
_reflns_number_gt                 620
_reflns_number_total              624
_reflns_special_details
;
 Reflections were merged by SHELXL according to the crystal
 class for the calculation of statistics and refinement.
 
 _reflns_Friedel_fraction is defined as the number of unique
 Friedel pairs measured divided by the number that would be
 possible theoretically, ignoring centric projections and
 systematic absences.
;
_reflns_threshold_expression      'I > 2\s(I)'
_computing_cell_refinement        ?
_computing_data_collection        ?
_computing_data_reduction         ?
_computing_molecular_graphics     'Olex2 (Dolomanov et al., 2009)'
_computing_publication_material   'Olex2 (Dolomanov et al., 2009)'
_computing_structure_refinement   'XL (Sheldrick, 2008)'
_computing_structure_solution     ?
_refine_diff_density_max          1.303
_refine_diff_density_min          -1.127
_refine_diff_density_rms          0.155
_refine_ls_extinction_coef        0.0188(12)
_refine_ls_extinction_expression  'Fc^*^=kFc[1+0.001xFc^2^\l^3^/sin(2\q)]^-1/4^'
_refine_ls_extinction_method      'SHELXL-2014/7 (Sheldrick 2014'
_refine_ls_goodness_of_fit_ref    1.280
_refine_ls_hydrogen_treatment     undef
_refine_ls_matrix_type            full
_refine_ls_number_parameters      54
_refine_ls_number_reflns          624
_refine_ls_number_restraints      0
_refine_ls_R_factor_all           0.0444
_refine_ls_R_factor_gt            0.0443
_refine_ls_restrained_S_all       1.280
_refine_ls_shift/su_max           0.001
_refine_ls_shift/su_mean          0.000
_refine_ls_structure_factor_coef  Fsqd
_refine_ls_weighting_details
'w=1/[\s^2^(Fo^2^)+(0.0743P)^2^+16.9695P] where P=(Fo^2^+2Fc^2^)/3'
_refine_ls_weighting_scheme       calc
_refine_ls_wR_factor_gt           0.1177
_refine_ls_wR_factor_ref          0.1180
_refine_special_details           ?
_olex2_refinement_description
;
1. Others
 Fixed Sof: O1(0.4) C1(0.2125) C2(0.2125) O1W(0.08333) O3(0.08333)
 O0AA(0.16667) O1AA(0.075) C5(0.425) C10(0.10625) C15(0.10625)
;
_atom_sites_solution_hydrogens    .
_atom_sites_solution_primary      ?
_atom_sites_solution_secondary    ?
loop_
  _atom_site_label
  _atom_site_type_symbol
  _atom_site_fract_x
  _atom_site_fract_y
  _atom_site_fract_z
  _atom_site_U_iso_or_equiv
  _atom_site_adp_type
  _atom_site_occupancy
  _atom_site_site_symmetry_order
  _atom_site_calc_flag
  _atom_site_refinement_flags_posn
  _atom_site_refinement_flags_adp
  _atom_site_refinement_flags_occupancy
  _atom_site_disorder_assembly
  _atom_site_disorder_group
 Zr1 Zr 0.38074(2) 0.0000 0.0000 0.0183(4) Uani 1 8 d S T P . .
 O1 O 0.3292(2) 0.0937(2) 0.0000 0.0312(9) Uani 0.8 2 d S T P . .
 C1 C 0.34846(17) 0.15154(17) 0.0000 0.0359(12) Uani 0.85 4 d S T P . .
 C2 C 0.2970(2) 0.2030(2) 0.0000 0.0487(16) Uani 0.85 4 d S T P . .
 O1W O 0.4332(3) 0.0668(3) 0.0668(3) 0.0192(15) Uani 0.5 6 d S T P . .
 O3 O 0.4497(3) 0.0503(3) 0.0503(3) 0.0188(17) Uani 0.5 6 d S T P . .
 O0AA O 0.3308(7) 0.1692(7) 0.1303(7) 0.112(7) Uani 0.3333 2 d S T P . .
 O1AA O 0.3055(10) 0.0762(12) 0.0000 0.032(4) Uani 0.15 2 d S T P . .
 C5 C 0.2352(4) 0.1870(4) 0.013(2) 0.085(12) Uani 0.425 1 d . . . . .
 C10 C 0.213(3) 0.119(3) 0.041(3) 0.093(14) Uiso 0.1062 1 d . . . . .
 C15 C 0.137(4) 0.103(3) 0.015(5) 0.14(3) Uiso 0.1062 1 d . . . . .

loop_
  _atom_site_aniso_label
  _atom_site_aniso_U_11
  _atom_site_aniso_U_22
  _atom_site_aniso_U_33
  _atom_site_aniso_U_23
  _atom_site_aniso_U_13
  _atom_site_aniso_U_12
 Zr1 0.0143(4) 0.0202(4) 0.0202(4) 0.000 0.000 0.000
 O1 0.020(2) 0.0272(19) 0.046(2) 0.000 0.000 0.0100(14)
 C1 0.0305(17) 0.0305(17) 0.047(3) 0.000 0.000 0.012(2)
 C2 0.037(2) 0.037(2) 0.071(4) 0.000 0.000 0.020(3)
 O1W 0.0192(15) 0.0192(15) 0.0192(15) -0.0005(19) 0.0005(19) 0.0005(19)
 O3 0.0188(17) 0.0188(17) 0.0188(17) -0.0022(17) 0.0022(17) 0.0022(17)
 O0AA 0.126(9) 0.126(9) 0.083(9) -0.031(8) 0.031(8) -0.044(9)
 O1AA 0.019(10) 0.047(14) 0.030(9) 0.000 0.000 0.017(8)
 C5 0.041(3) 0.037(3) 0.18(4) 0.018(8) 0.017(8) 0.018(3)

_geom_special_details
;
 All esds (except the esd in the dihedral angle between two l.s. planes)
 are estimated using the full covariance matrix.  The cell esds are taken
 into account individually in the estimation of esds in distances, angles
 and torsion angles; correlations between esds in cell parameters are only
 used when they are defined by crystal symmetry.  An approximate (isotropic)
 treatment of cell esds is used for estimating esds involving l.s. planes.
;
loop_
  _geom_bond_atom_site_label_1
  _geom_bond_atom_site_label_2
  _geom_bond_distance
  _geom_bond_site_symmetry_2
  _geom_bond_publ_flag
 Zr1 O1 2.219(4) 118 ?
 Zr1 O1 2.219(4) . ?
 Zr1 O1 2.219(4) 117 ?
 Zr1 O1 2.219(4) 2 ?
 Zr1 O3 2.055(2) . ?
 Zr1 O3 2.055(2) 2 ?
 Zr1 O3 2.055(2) 100 ?
 Zr1 O3 2.055(2) 99 ?
 Zr1 O1AA 2.22(2) 118 ?
 Zr1 O1AA 2.22(2) 2 ?
 Zr1 O1AA 2.22(2) 117 ?
 Zr1 O1AA 2.22(2) . ?
 O1 C1 1.263(5) . ?
 O1 O1AA 0.61(2) . ?
 C1 O1 1.263(5) 174 ?
 C1 C2 1.508(7) . ?
 C1 O1AA 1.80(3) . ?
 C1 O1AA 1.80(3) 174 ?
 C2 C5 1.353(13) 99 ?
 C2 C5 1.353(13) 174 ?
 C2 C5 1.353(13) 80 ?
 C2 C5 1.353(13) . ?
 O1W Zr1 2.242(4) 173 ?
 O1W Zr1 2.242(4) 153 ?
 O1W O3 0.592(8) . ?
 O3 Zr1 2.055(2) 173 ?
 O3 Zr1 2.055(2) 153 ?
 O0AA O0AA 1.14(3) 159 ?
 O0AA O0AA 1.14(3) 60 ?
 C5 C5 0.55(9) 99 ?
 C5 C5 1.413(12) 104 ?
 C5 C5 1.52(3) 6 ?
 C5 C10 1.59(6) . ?
 C5 C10 1.87(7) 99 ?
 C10 C5 1.87(7) 99 ?
 C10 C10 1.71(12) 99 ?
 C10 C15 1.70(10) . ?
 C10 C15 1.99(10) 99 ?
 C15 C10 1.99(10) 99 ?
 C15 C15 0.62(19) 99 ?
 C15 C15 1.18(16) 6 ?
 C15 C15 1.00(13) 104 ?

loop_
  _geom_angle_atom_site_label_1
  _geom_angle_atom_site_label_2
  _geom_angle_atom_site_label_3
  _geom_angle
  _geom_angle_site_symmetry_1
  _geom_angle_site_symmetry_3
  _geom_angle_publ_flag
 O1 Zr1 O1 76.58(10) 118 2 ?
 O1 Zr1 O1 76.58(10) 118 . ?
 O1 Zr1 O1 122.4(2) 2 . ?
 O1 Zr1 O1 76.58(10) 2 117 ?
 O1 Zr1 O1 122.4(2) 118 117 ?
 O1 Zr1 O1 76.58(10) 117 . ?
 O1 Zr1 O1AA 15.8(6) 118 118 ?
 O1 Zr1 O1AA 70.2(3) 117 . ?
 O1 Zr1 O1AA 70.2(3) 2 117 ?
 O1 Zr1 O1AA 70.2(3) 2 118 ?
 O1 Zr1 O1AA 70.2(3) 118 . ?
 O1 Zr1 O1AA 70.2(3) . 118 ?
 O1 Zr1 O1AA 106.6(7) . 2 ?
 O1 Zr1 O1AA 106.6(7) 118 117 ?
 O1 Zr1 O1AA 15.8(6) . . ?
 O1 Zr1 O1AA 106.6(7) 117 118 ?
 O1 Zr1 O1AA 106.6(7) 2 . ?
 O1 Zr1 O1AA 70.2(3) 118 2 ?
 O1 Zr1 O1AA 70.2(3) 117 2 ?
 O1 Zr1 O1AA 15.8(6) 117 117 ?
 O1 Zr1 O1AA 70.2(3) . 117 ?
 O1 Zr1 O1AA 15.8(6) 2 2 ?
 O3 Zr1 O1 141.29(7) 100 . ?
 O3 Zr1 O1 141.29(7) 100 118 ?
 O3 Zr1 O1 141.29(7) 2 117 ?
 O3 Zr1 O1 83.7(2) . . ?
 O3 Zr1 O1 83.7(2) 99 118 ?
 O3 Zr1 O1 83.7(2) 2 118 ?
 O3 Zr1 O1 141.29(7) 99 117 ?
 O3 Zr1 O1 141.29(7) 99 2 ?
 O3 Zr1 O1 83.7(2) 2 2 ?
 O3 Zr1 O1 83.7(2) . 117 ?
 O3 Zr1 O1 141.29(7) 2 . ?
 O3 Zr1 O1 83.7(2) 100 117 ?
 O3 Zr1 O1 141.29(7) . 118 ?
 O3 Zr1 O1 141.29(7) . 2 ?
 O3 Zr1 O1 83.7(2) 99 . ?
 O3 Zr1 O1 83.7(2) 100 2 ?
 O3 Zr1 O3 91.9(5) 100 99 ?
 O3 Zr1 O3 61.1(3) 99 2 ?
 O3 Zr1 O3 61.1(3) . 99 ?
 O3 Zr1 O3 61.1(3) 100 2 ?
 O3 Zr1 O3 91.9(5) . 2 ?
 O3 Zr1 O3 61.1(3) . 100 ?
 O3 Zr1 O1AA 148.23(18) . 118 ?
 O3 Zr1 O1AA 148.23(18) 99 2 ?
 O3 Zr1 O1AA 148.23(18) 99 117 ?
 O3 Zr1 O1AA 148.23(18) . 2 ?
 O3 Zr1 O1AA 97.3(6) 2 2 ?
 O3 Zr1 O1AA 97.3(6) 100 2 ?
 O3 Zr1 O1AA 97.3(6) 100 117 ?
 O3 Zr1 O1AA 97.3(6) 2 118 ?
 O3 Zr1 O1AA 97.3(6) 99 118 ?
 O3 Zr1 O1AA 97.3(6) . 117 ?
 O3 Zr1 O1AA 97.3(6) . . ?
 O3 Zr1 O1AA 148.23(18) 100 118 ?
 O3 Zr1 O1AA 148.23(18) 2 . ?
 O3 Zr1 O1AA 97.3(6) 99 . ?
 O3 Zr1 O1AA 148.23(18) 2 117 ?
 O3 Zr1 O1AA 148.23(18) 100 . ?
 O1AA Zr1 O1AA 60.4(7) 118 2 ?
 O1AA Zr1 O1AA 60.4(7) 2 117 ?
 O1AA Zr1 O1AA 60.4(7) 117 . ?
 O1AA Zr1 O1AA 90.7(13) 2 . ?
 O1AA Zr1 O1AA 90.7(13) 118 117 ?
 O1AA Zr1 O1AA 60.4(7) 118 . ?
 C1 O1 Zr1 132.8(3) . . ?
 O1AA O1 Zr1 82(2) . . ?
 O1AA O1 C1 145(2) . . ?
 O1 C1 O1 126.9(5) 174 . ?
 O1 C1 C2 116.6(3) 174 . ?
 O1 C1 C2 116.6(3) . . ?
 O1 C1 O1AA 138.1(7) . 174 ?
 O1 C1 O1AA 11.2(7) . . ?
 O1 C1 O1AA 138.1(7) 174 . ?
 O1 C1 O1AA 11.2(7) 174 174 ?
 C2 C1 O1AA 105.3(7) . 174 ?
 C2 C1 O1AA 105.3(7) . . ?
 O1AA C1 O1AA 149.3(13) 174 . ?
 C5 C2 C1 119.9(4) 99 . ?
 C5 C2 C1 119.9(4) . . ?
 C5 C2 C1 119.9(4) 80 . ?
 C5 C2 C1 119.9(4) 174 . ?
 C5 C2 C5 120.3(8) 80 . ?
 C5 C2 C5 120.3(9) 99 174 ?
 C5 C2 C5 115.0(14) 174 . ?
 C5 C2 C5 23(4) 174 80 ?
 C5 C2 C5 115.0(14) 99 80 ?
 C5 C2 C5 23(4) 99 . ?
 Zr1 O1W Zr1 102.6(3) 153 173 ?
 Zr1 O1W Zr1 102.6(3) . 153 ?
 Zr1 O1W Zr1 102.6(3) . 173 ?
 O3 O1W Zr1 64.3(2) . 153 ?
 O3 O1W Zr1 64.3(2) . 173 ?
 O3 O1W Zr1 64.3(2) . . ?
 Zr1 O3 Zr1 116.65(15) . 153 ?
 Zr1 O3 Zr1 116.65(15) 173 153 ?
 Zr1 O3 Zr1 116.65(15) . 173 ?
 O1W O3 Zr1 100.7(2) . 153 ?
 O1W O3 Zr1 100.7(2) . . ?
 O1W O3 Zr1 100.7(2) . 173 ?
 O0AA O0AA O0AA 60.000(5) 159 60 ?
 O1 O1AA Zr1 82(2) . . ?
 O1 O1AA C1 23.7(18) . . ?
 C1 O1AA Zr1 105.7(10) . . ?
 C2 C5 C5 119.9(4) . 104 ?
 C2 C5 C5 113(2) . 6 ?
 C2 C5 C10 124(2) . . ?
 C2 C5 C10 107(3) . 99 ?
 C5 C5 C2 78.3(18) 99 . ?
 C5 C5 C5 90.007(2) 99 104 ?
 C5 C5 C5 69(3) 99 6 ?
 C5 C5 C5 21(3) 104 6 ?
 C5 C5 C10 53(2) 99 99 ?
 C5 C5 C10 122(2) 6 . ?
 C5 C5 C10 111(3) 99 . ?
 C5 C5 C10 115(2) 104 . ?
 C5 C5 C10 111.4(19) 104 99 ?
 C5 C5 C10 97(3) 6 99 ?
 C10 C5 C10 59(4) . 99 ?
 C5 C10 C5 16(3) . 99 ?
 C5 C10 C10 69(3) . 99 ?
 C5 C10 C15 88(3) 99 99 ?
 C5 C10 C15 108(5) . . ?
 C5 C10 C15 99(4) . 99 ?
 C10 C10 C5 53(2) 99 99 ?
 C10 C10 C15 54(3) 99 99 ?
 C15 C10 C5 100(5) . 99 ?
 C15 C10 C10 71(4) . 99 ?
 C15 C10 C15 17(6) . 99 ?
 C10 C15 C10 55(4) . 99 ?
 C15 C15 C10 94(8) 6 99 ?
 C15 C15 C10 54(3) 99 99 ?
 C15 C15 C10 109(4) 99 . ?
 C15 C15 C10 128(3) 6 . ?
 C15 C15 C10 117(3) 104 99 ?
 C15 C15 C10 122(3) 104 . ?
 C15 C15 C15 58(8) 99 6 ?
 C15 C15 C15 89.995(19) 99 104 ?
 C15 C15 C15 32(8) 104 6 ?

_olex2_submission_special_instructions 'No special instructions were received'
